# Supplementary material for: Efficient thin-film perovskite solar cells from a two-step sintering of nanocrystals
Source: Royal Society of Chemistry journal article supplement (doi:10.1039/d2nr06745e), 2023-01-01
Supplement: d2nr06745e1.pdf [file d2nr06745e1.pdf]

Supplementary Information for

# Efficient Thin-Film Perovskite Solar Cells from a Two-Step Sintering of Nanocrystals

*Yuhao Peng<sup>†,‡</sup>, Junli Huang<sup>†,‡</sup>, Lue Zhou<sup>†,‡</sup>, Yuncheng Mu<sup>†</sup>, Shuyao Han<sup>†</sup>, Shu Zhou<sup>†,\*</sup>,  
Pingqi Gao<sup>†,\*</sup>*

<sup>†</sup> *School of Materials, Sun Yat-sen University, Guangzhou 510275, China*

<sup>‡</sup> *These authors contribute equally.*

E-mail: \*zhoush67@mail.sysu.edu.cn

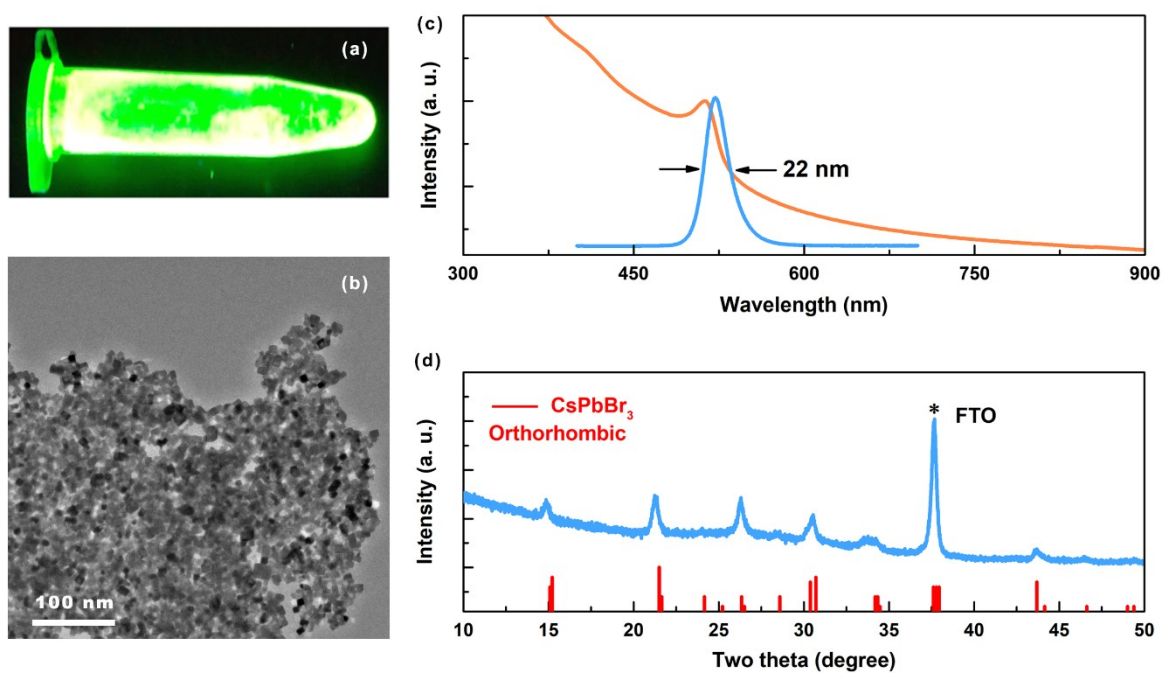

**Figure S1.** Strongly-emissive CsPbBr<sub>3</sub> NCs. (a) Image of a colloidal CsPbBr<sub>3</sub>-NC ink under UV light. (b) Low-resolution TEM image of CsPbBr<sub>3</sub> NCs. (c) Optical absorption and PL spectra of CsPbBr<sub>3</sub> NCs. (d) XRD result of CsPbBr<sub>3</sub> NCs indicating an orthorhombic crystal lattice.

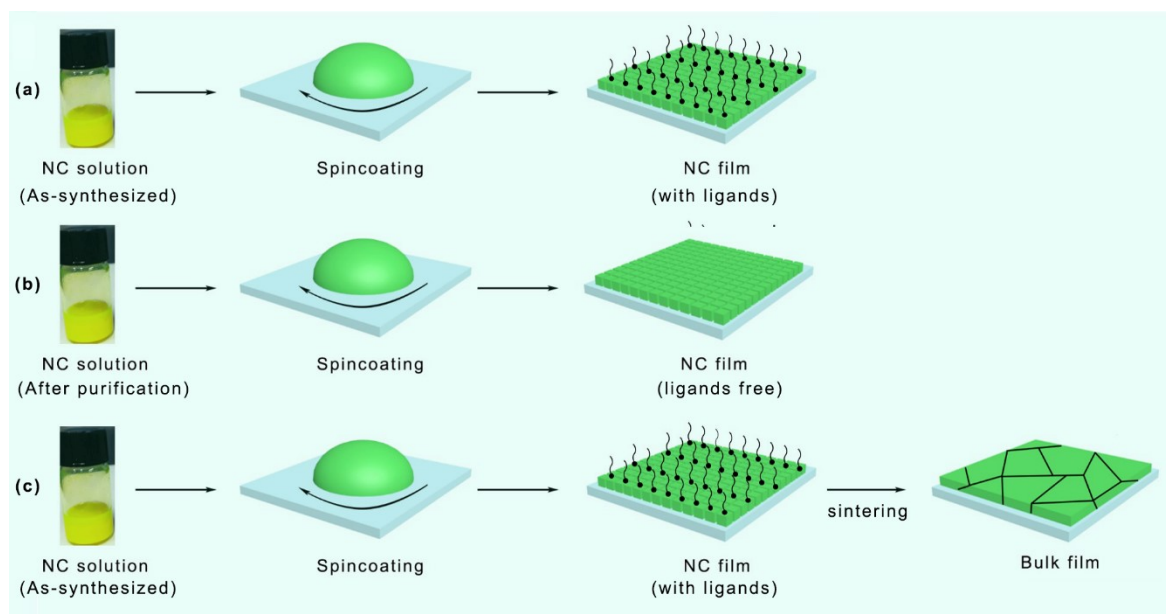

**Figure S2.** Schematic showing deposition of CsPbBr<sub>3</sub> films from NC inks. (a) As-synthesized CsPbBr<sub>3</sub> NCs are directly spincoated onto a FTO substrate, resulting in NC film with short alky ligands (b) CsPbBr<sub>3</sub> NCs are purified by washing in toluene for two times before spincoating, resulting in NC film that are free of ligands. (c) As-synthesized CsPbBr<sub>3</sub> NCs are spincoated onto a FTO substrate followed by sintering, resulting in bulk film. The process can then be repeated to create a perovskite film with desired thickness.

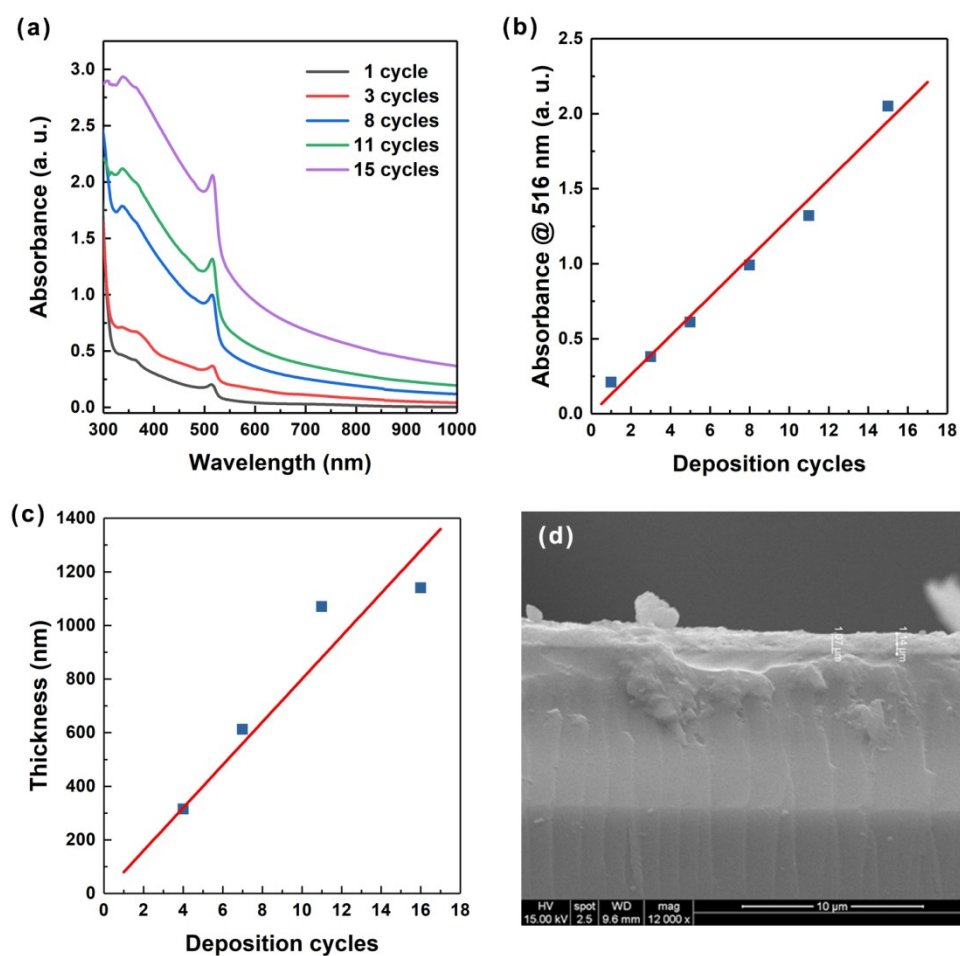

**Figure S3.** (a) Absorption spectra of CsPbBr<sub>3</sub> NC films, depending on the number of NC deposition cycles.

(b) Normalized absorption at 516 nm for CsPbBr<sub>3</sub> NC films. (c) Thickness of CsPbBr<sub>3</sub> NC films measured

by SEM, depending on the number of NC deposition cycles. (d) SEM image of a CsPbBr<sub>3</sub> NC film on a

FTO glass substrate.

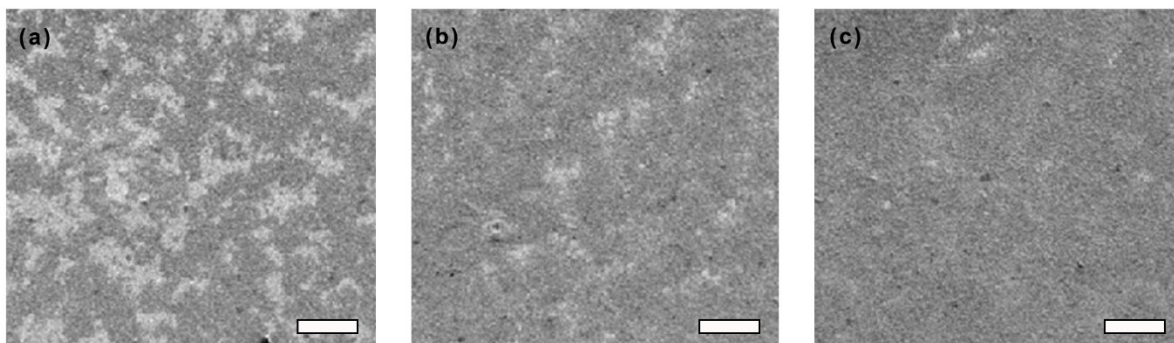

**Figure S4.** SEM images of CsPbBr<sub>3</sub>-NC films show coverage of the substrate depending on the number of NC deposition cycles. (a) One-cycle, (b) two-cycle and (c) three-cycle spin-coating. The scale bar for all images is 10  $\mu\text{m}$ .

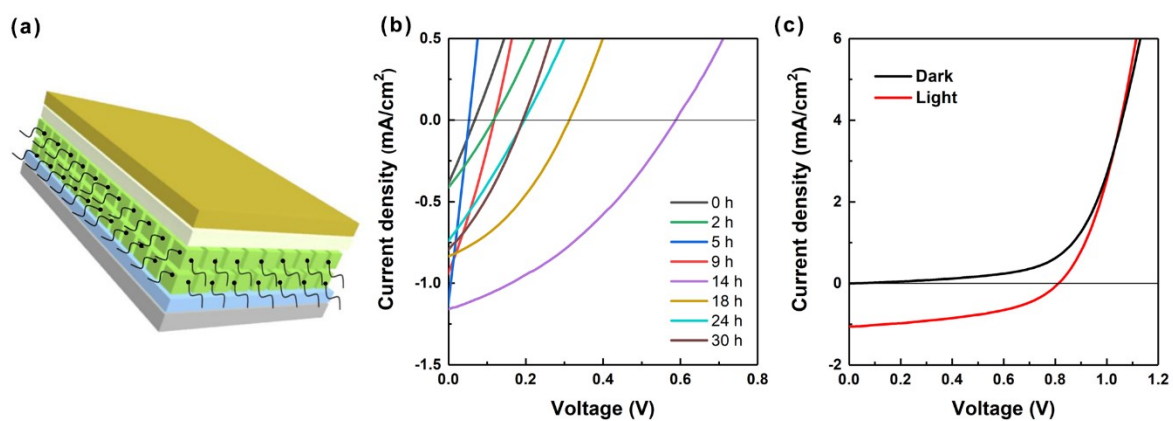

**Figure S5.** (a) Schematic showing the solar cell device structure. The CsPbBr<sub>3</sub> NCs are surface terminated with short ligands. (b) Current density-voltage curves of the solar cells as a function of the oxidation time of Spiro-MeOTAD in dry air. (c) Current density-voltage curves of the solar cells measured under dark and light (AM 1.5) conditions.

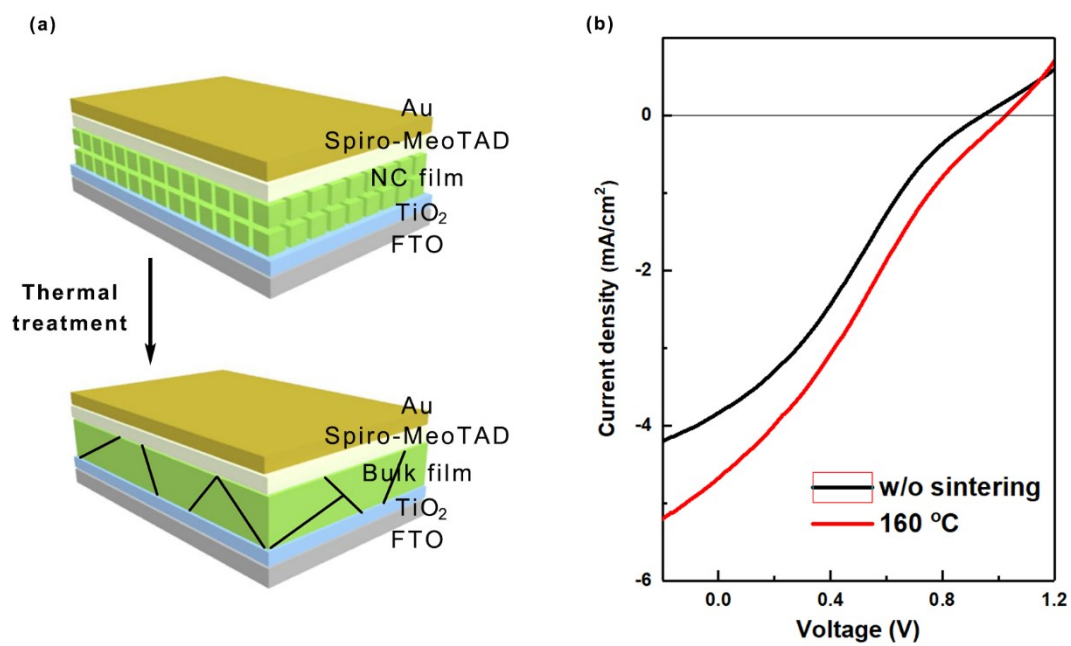

**Figure S6.** Effect of sintering on the performance of solar cells based on purified CsPbBr<sub>3</sub> NCs.

**Table S1.** Performance of the CsPbBr<sub>3</sub> solar cells as a function of the deposition cycles.

| Method         | Deposition cycles | V <sub>oc</sub> (V) | J <sub>sc</sub> (mA/cm <sup>2</sup> ) | FF   | PCE (%) |
|----------------|-------------------|---------------------|---------------------------------------|------|---------|
| As-synthesized | 3                 | 0.64                | 0.90                                  | 0.35 | 0.20    |
|                | 6                 | 0.59                | 0.80                                  | 0.40 | 0.19    |
|                | 9                 | 0.62                | 0.95                                  | 0.37 | 0.22    |
|                | 12                | 0.55                | 0.91                                  | 0.40 | 0.20    |
| Purified       | 6                 | 0.94                | 2.84                                  | 0.24 | 0.64    |
|                | 9                 | 1.02                | 6.26                                  | 0.31 | 1.97    |
| Sintered       | 6                 | 0.85                | 5.70                                  | 0.51 | 2.47    |
|                | 9                 | 1.05                | 6.76                                  | 0.52 | 3.71    |
|                | 12                | 1.08                | 5.35                                  | 0.42 | 2.42    |
|                | 15                | 1.09                | 4.30                                  | 0.42 | 1.96    |

**Table S2.** Performance of the CsPbBr<sub>3</sub> solar cells as a function of the sintering temperature.

| Temperature   | V <sub>oc</sub> (V) | J <sub>sc</sub> (mA/cm <sup>2</sup> ) | FF        | PCE (%)   |
|---------------|---------------------|---------------------------------------|-----------|-----------|
| w/o sintering | 0.60±0.04           | 0.89±0.06                             | 0.38±0.02 | 0.20±0.01 |
| 90 °C         | 1.35±0.02           | 0.92±0.05                             | 0.49±0.02 | 0.62±0.04 |
| 160 °C        | 1.16±0.03           | 2.14±0.26                             | 0.35±0.03 | 0.86±0.12 |
| 230 °C        | 1.23±0.03           | 6.44±0.56                             | 0.50±0.04 | 3.90±0.37 |
| 280 °C        | 1.28±0.03           | 5.85±0.28                             | 0.38±0.10 | 2.88±0.83 |

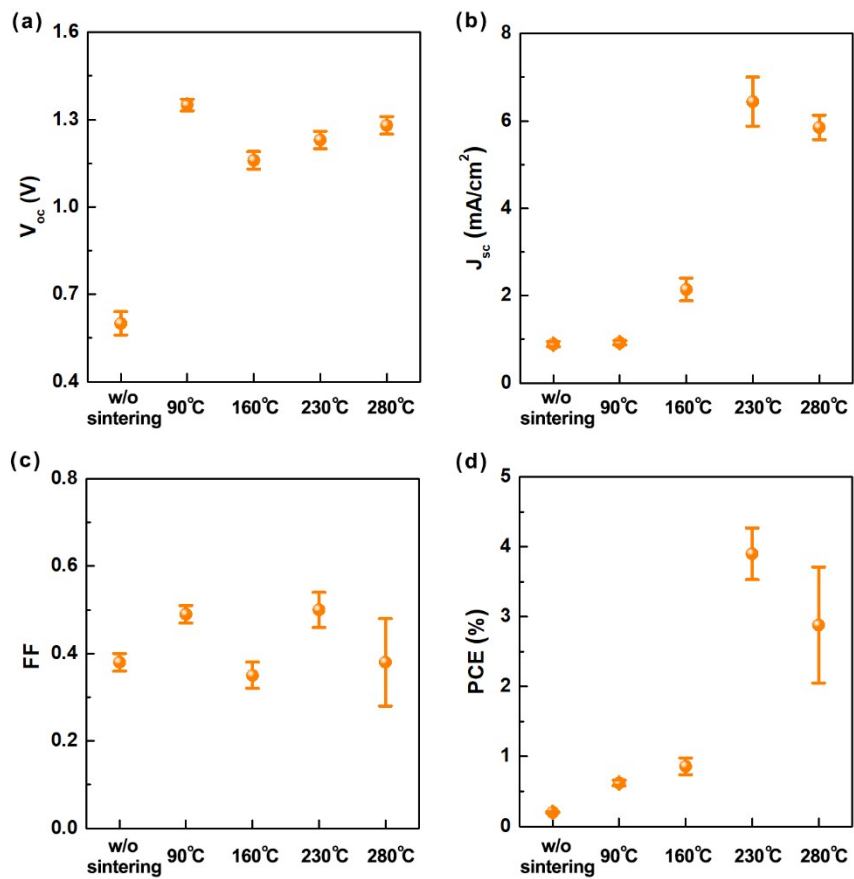

**Figure S7.** Device performance of the CsPbBr<sub>3</sub> solar cells as a function of the sintering temperature. Each point represents 9 contacts from the same film. (a)  $V_{oc}$ . (b)  $J_{sc}$ . (c) FF. (d) PCE.

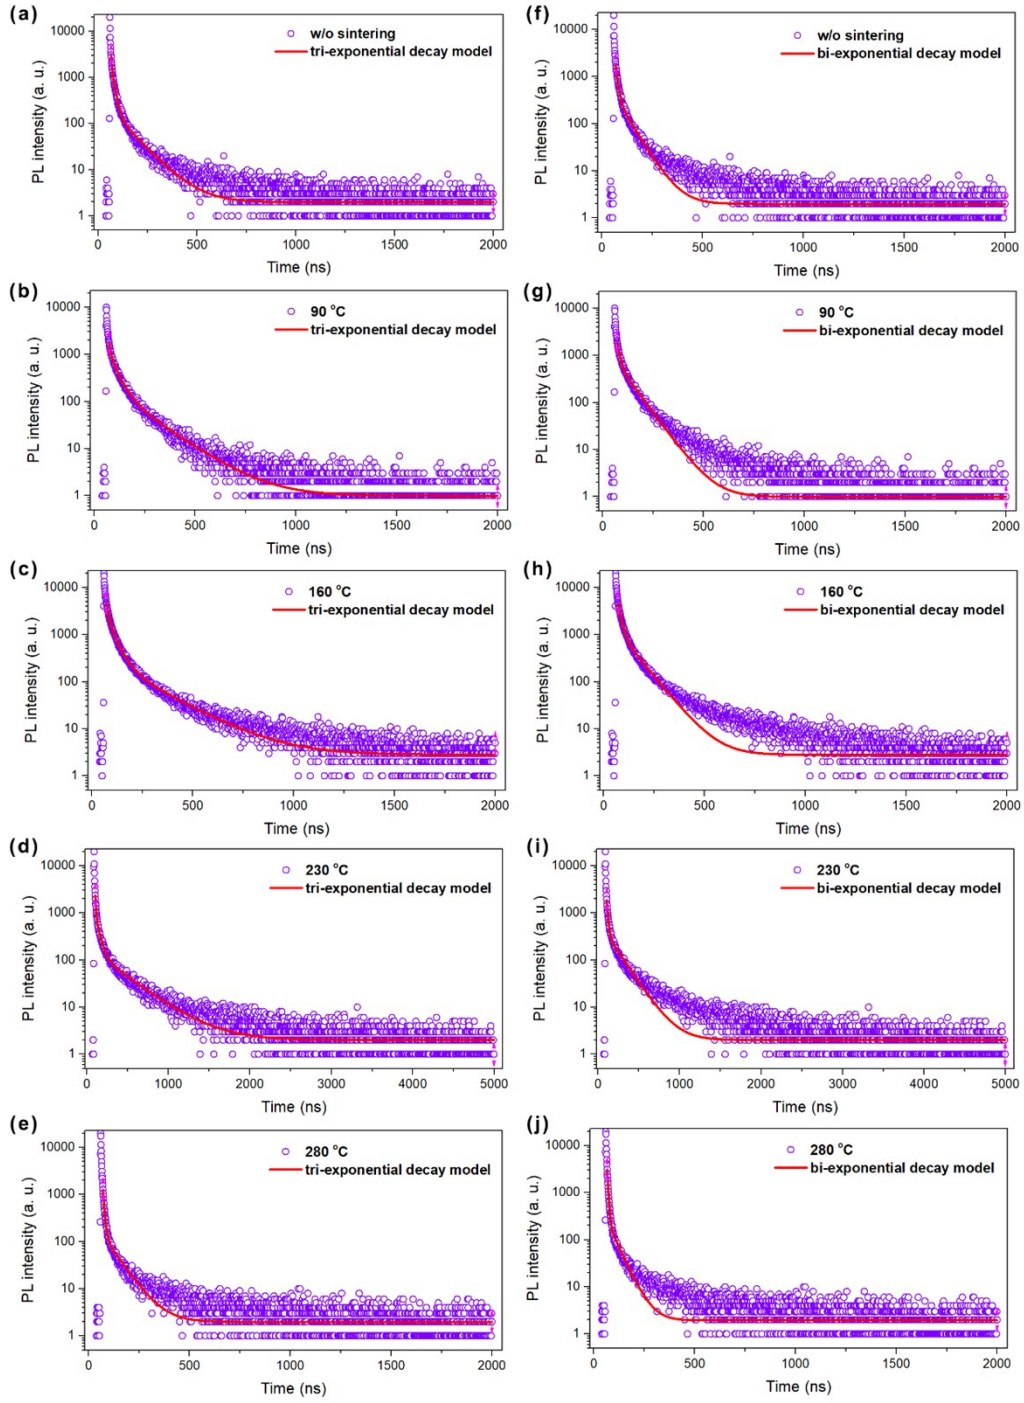

**Figure S8.** Fitting of the TRPL data by (a-e) a tri-exponential decay model and (f-j) a bi-exponential decay model, respectively. It is found that the curves could be better fitted by a tri-exponential decay model than a bi-exponential decay model. Therefore, a tri-exponential decay model was employed to fit all the curves in this work.

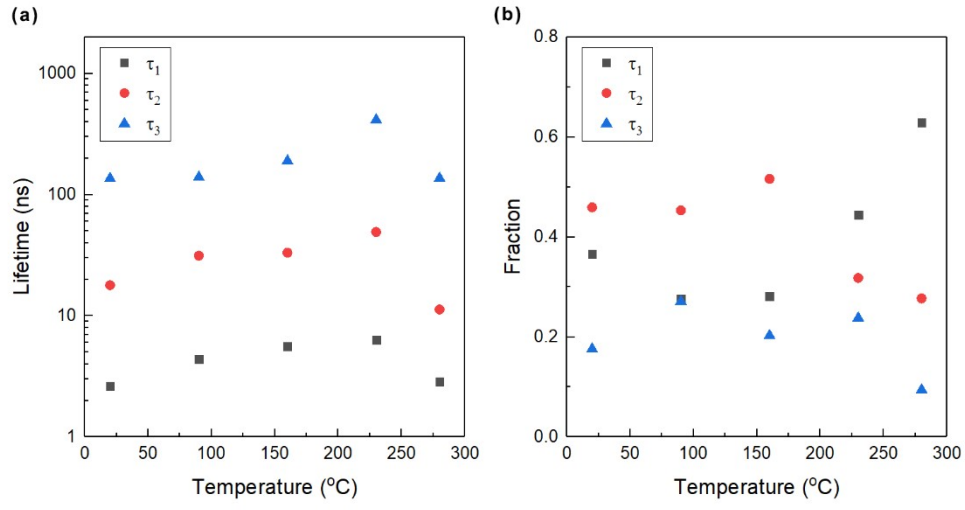

**Figure S9.** The TRPL curves are fitted with a three-component exponential decay. The decay lifetime ( $\tau_1$ ,  $\tau_2$ ,  $\tau_3$ ,) and corresponding fraction ( $B_1$ ,  $B_2$ ,  $B_3$ ) are obtained. The average lifetime ( $\tau_{ave}$ ) is related to the

lifetime and fraction of each decay component as

$$\tau_{ave} = \frac{B_1\tau_1^2 + B_2\tau_2^2 + B_3\tau_3^2}{B_1\tau_1 + B_2\tau_2 + B_3\tau_3}.$$

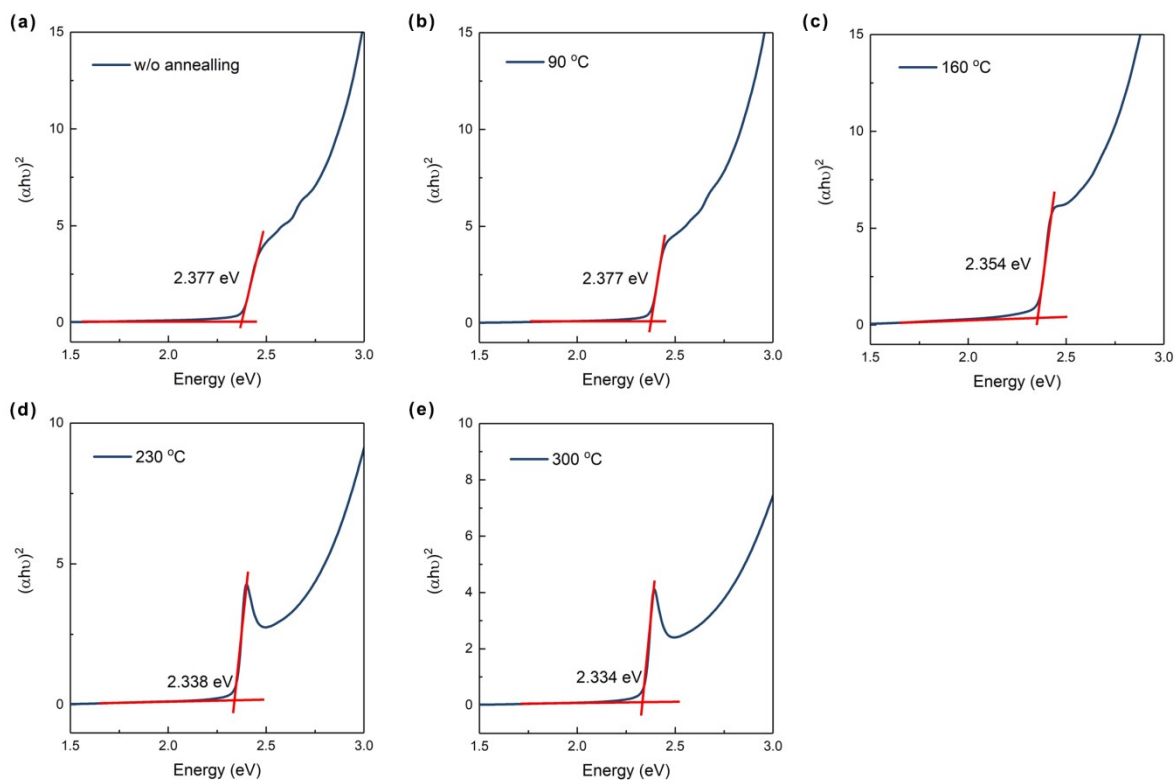

**Figure S10.** Tauc plot of absorption spectra of CsPbBr<sub>3</sub>-NC films after annealing at different temperatures.

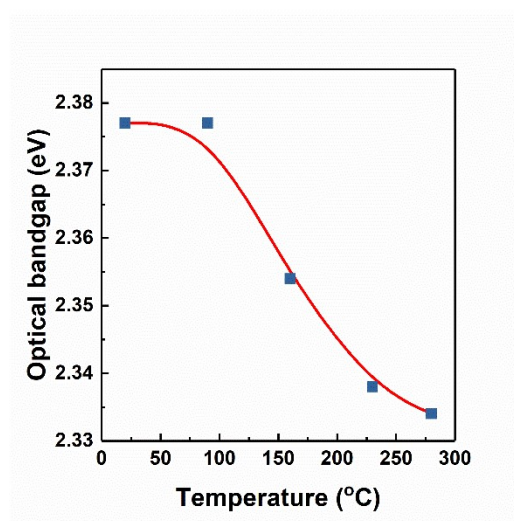

**Figure S11.** Evolution of optical bandgap of CsPbBr<sub>3</sub> NC films with increasing annealing temperature.

When the T increases to 100 °C, the  $E_g$  remains almost unchanged, suggesting the size of NCs remains unchanged. As the T further increases, the  $E_g$  gradually decreases. The trend of  $E_g$  shift is consistent with the increase of grain size after thermal sintering.

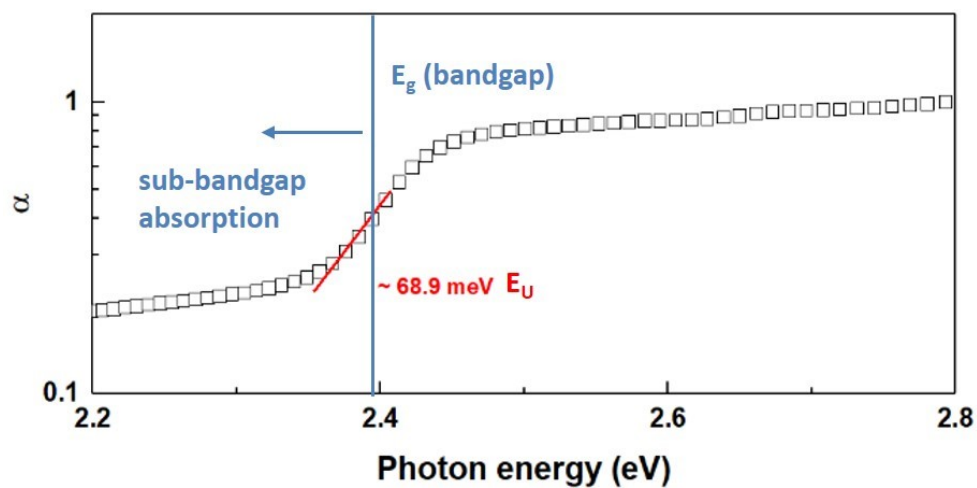

**Figure S12.** Calculation of  $E_U$  from fitting of sub-bandgap absorption by Equation 1.

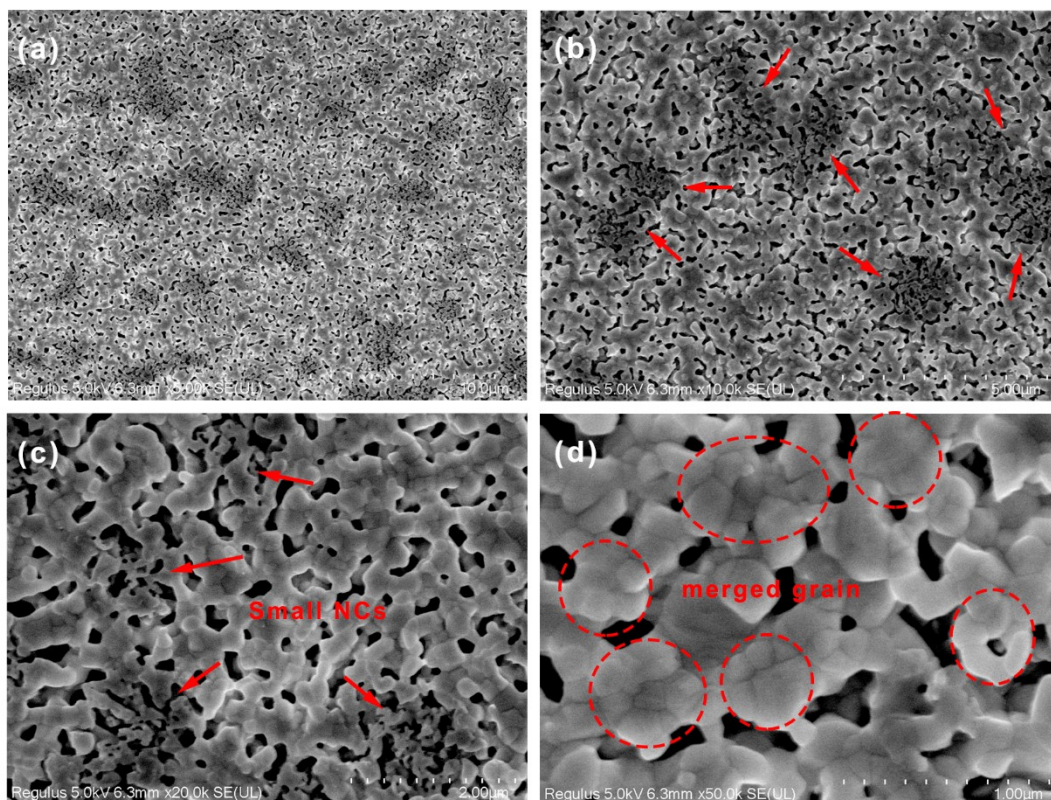

**Figure S13.** SEM images of the CsPbBr<sub>3</sub> film after sintering at 160 °C taken at different magnifications.

Both small NCs and merged grains can be observed in this intermediate stage. In the absence of reaction precursors, material migrates from smaller NCs to larger grains in a defocusing process analogous to Ostwald ripening observed normally in fabrication process.

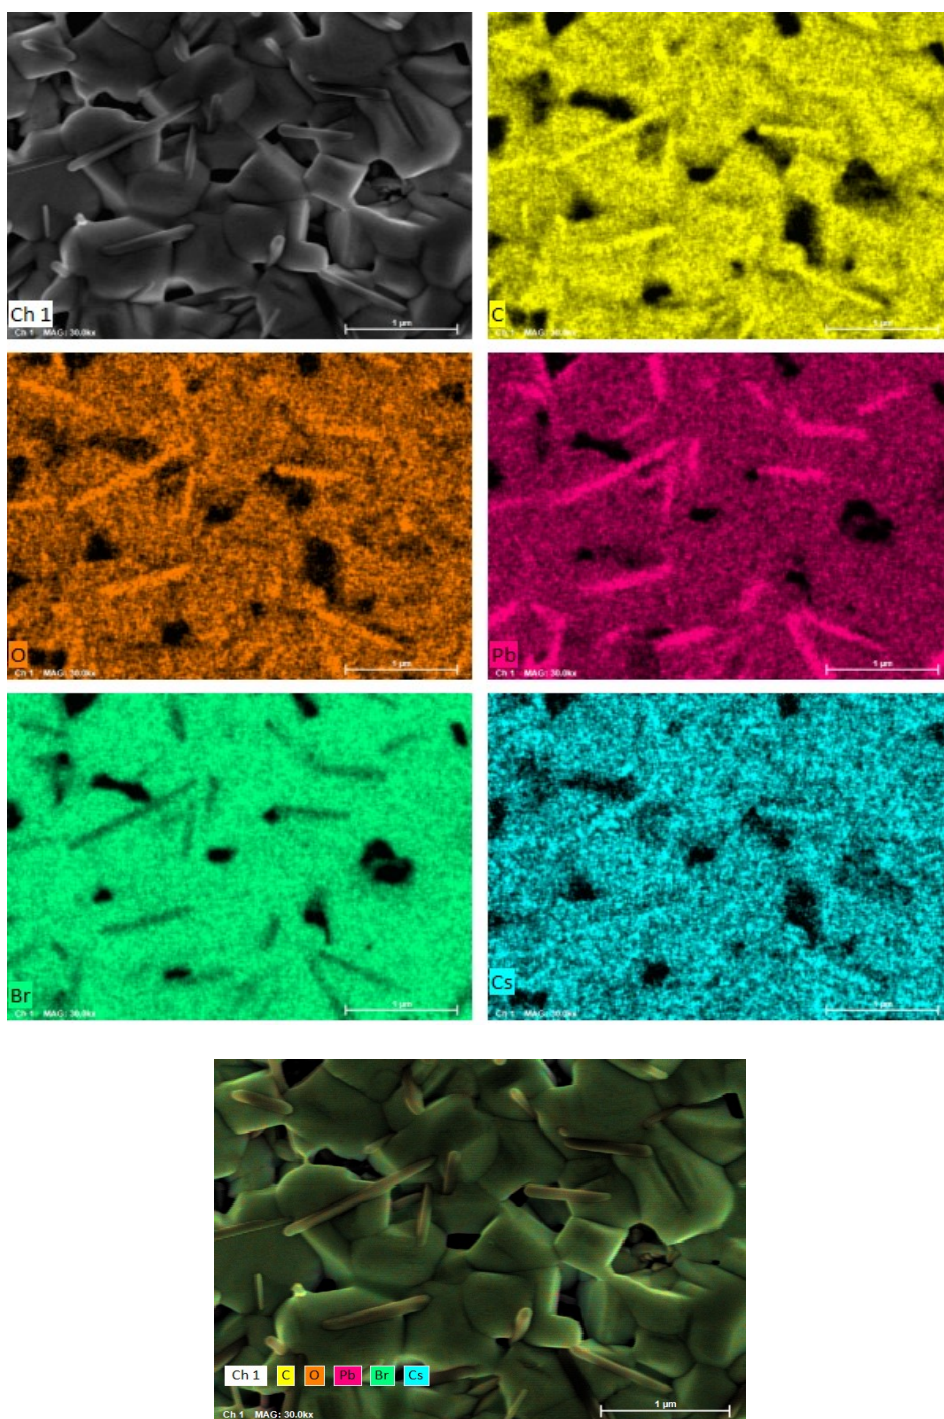

**Figure S14.** EDX mapping of the CsPbBr<sub>3</sub> film after sintering at 280 °C. The new grains with a rod shape were identified to be PbCO<sub>3</sub> from the C, O and Pb spectrum.

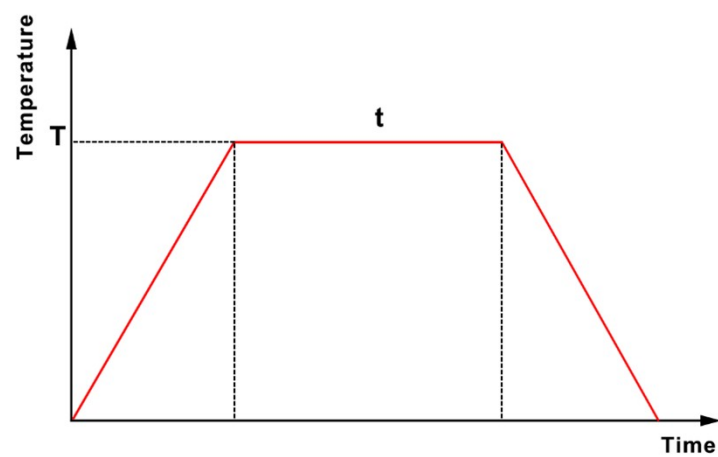

**Figure S15.** Illustrative representation of the one-step sintering plot. All the samples were heated from room temperature at a heating rate of  $30\text{ }^{\circ}\text{C}/\text{min}$ .

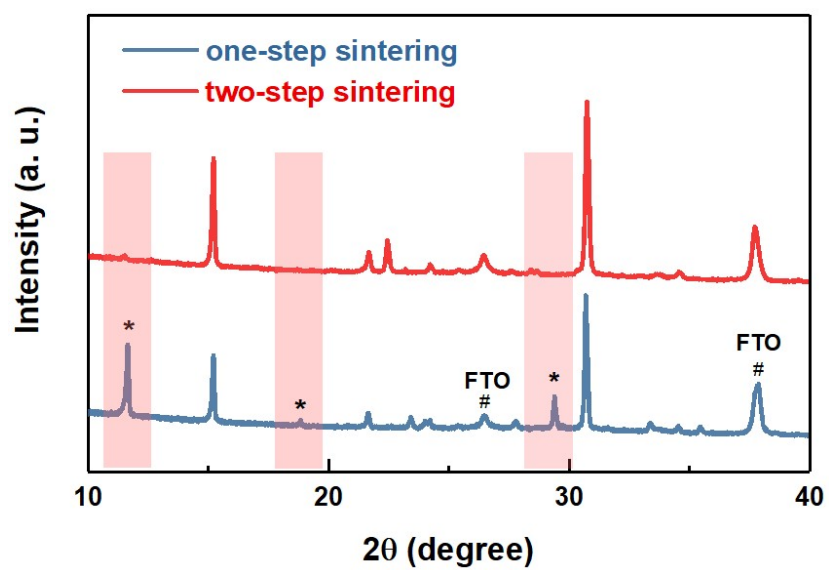

**Figure S16.** XRD patterns for the CsPbBr<sub>3</sub> films obtained by one-step sintering (280 °C 2h) and two-step sintering (230 °C 2h + 280 °C 20 min).

**Table S3.** Performance of the CsPbBr<sub>3</sub> solar cells obtained by one-step sintering and two-step sintering.

| Method                                            |          | V <sub>oc</sub> (V) | J <sub>sc</sub> (mA/cm <sup>2</sup> ) | FF   | PCE (%) |
|---------------------------------------------------|----------|---------------------|---------------------------------------|------|---------|
| One-step sintering<br>(230 °C 2h)                 | Forward  | 1.24                | 6.75                                  | 0.49 | 4.07    |
|                                                   | Backward | 1.29                | 6.55                                  | 0.39 | 3.29    |
| One-step sintering<br>(280 °C 2h)                 | Forward  | 1.05                | 6.44                                  | 0.52 | 3.53    |
|                                                   | Backward | 0.99                | 6.52                                  | 0.34 | 2.18    |
| Two-step sintering<br>(230 °C 2h + 280 °C 20 min) | Forward  | 1.35                | 7.18                                  | 0.54 | 5.23    |
|                                                   | Backward | 1.33                | 6.92                                  | 0.51 | 4.71    |

**Table S4.** Performance of CsPbBr<sub>3</sub>-based planar perovskite solar cells.

| Device configuration                                                               | Method          | V <sub>oc</sub><br>(V) | J <sub>sc</sub><br>(mA/cm <sup>2</sup> ) | FF   | PCE<br>(%) | Reference     |
|------------------------------------------------------------------------------------|-----------------|------------------------|------------------------------------------|------|------------|---------------|
| FTO/c-TiO <sub>2</sub> /CsPbBr <sub>3</sub> /Spiro/Au                              | Spin-coating    | 0.96                   | 6.76                                     | 0.73 | 4.7        | <sup>1</sup>  |
| FTO/c-TiO <sub>2</sub> /CsPbBr <sub>3</sub> /PTAA/Au                               | Spin-coating    | 1.28                   | 6.24                                     | 0.74 | 5.9        | <sup>1</sup>  |
| FTO/c-TiO <sub>2</sub> /CsPbBr <sub>3</sub> /Spiro/Au                              | Spin-coating    | 1.41                   | 7.05                                     | 0.55 | 5.5        | <sup>2</sup>  |
| FTO/c-TiO <sub>2</sub> /CsPbBr <sub>3</sub> /Spiro/Au                              | Spin-coating    | 1.54                   | 5.65                                     | 0.62 | 5.4        | <sup>3</sup>  |
| FTO/c-TiO <sub>2</sub> /CsPbBr <sub>3</sub> /Spiro/Au                              | Evaporation     | 1.27                   | 6.45                                     | 0.77 | 6.4        | <sup>4</sup>  |
| FTO/c-TiO <sub>2</sub> /CsPbBr <sub>3</sub> /Spiro/Au                              | Sintering       | 1.35                   | 7.18                                     | 0.54 | 5.2        | This work     |
| FTO/GQDs/CsPbBr <sub>3</sub> /PQDs/carbon                                          | Spin-coating    | 1.21                   | 5.08                                     | 0.66 | 4.1        | <sup>5</sup>  |
| FTO/ c-TiO <sub>2</sub> /CsPbBr <sub>3</sub> /P3HT:PCBM/carbon                     | Spin-coating    | 1.5                    | 7.82                                     | 0.76 | 8.9        | <sup>6</sup>  |
| FTO/ c-TiO <sub>2</sub> /CsPbBr <sub>3</sub> / CuCrO <sub>2</sub> NCs /carbon      | Spin-coating    | 1.63                   | 7.73                                     | 0.86 | 10.9       | <sup>7</sup>  |
| FTO/ c-TiO <sub>2</sub> /CsPbBr <sub>3</sub> / CuInS <sub>2</sub> :ZnS QDs /carbon | Spin-coating    | 1.62                   | 7.81                                     | 0.85 | 10.8       | <sup>8</sup>  |
| FTO/c-TiO <sub>2</sub> /ZrO <sub>2</sub> /CsPbBr <sub>3</sub> /carbon              | Screen-printing | 1.36                   | 7.21                                     | 0.58 | 5.7        | <sup>9</sup>  |
| FTO/c-TiO <sub>2</sub> /CsPbBr <sub>3</sub> /CuPc/carbon                           | Evaporation     | 1.33                   | 7.59                                     | 0.75 | 7.6        | <sup>10</sup> |

## Reference

- (1) Kulbak, M.; Cahen, D.; Hodes, G. How Important Is the Organic Part of Lead Halide Perovskite Photovoltaic Cells? Efficient CsPbBr<sub>3</sub> Cells. *The Journal of Physical Chemistry Letters* **2015**, *6*, 2452-2456.
- (2) Hoffman, J. B.; Zaiats, G.; Wappes, I.; Kamat, P. V. CsPbBr<sub>3</sub> Solar Cells: Controlled Film Growth through Layer-by-Layer Quantum Dot Deposition. *Chemistry of Materials* **2017**, *29*, 9767-9774.
- (3) Akkerman, Q. A.; Gandini, M.; Di Stasio, F.; Rastogi, P.; Palazon, F.; Bertoni, G.; Ball, J. M.; Prato, M.; Petrozza, A.; Manna, L. Strongly emissive perovskite nanocrystal inks for high-voltage solar cells. *Nature Energy* **2016**, *2*, 16194.
- (4) Lei, J.; Gao, F.; Wang, H.; Li, J.; Jiang, J.; Wu, X.; Gao, R.; Yang, Z.; Liu, S. Efficient planar CsPbBr<sub>3</sub> perovskite solar cells by dual-source vacuum evaporation. *Solar Energy Materials and Solar Cells* **2018**, *187*, 1-8.
- (5) Duan, J.; Zhao, Y.; He, B.; Tang, Q. Simplified Perovskite Solar Cell with 4.1% Efficiency Employing Inorganic CsPbBr<sub>3</sub> as Light Absorber. *Small* **2018**, *14*, 1704443.
- (6) Du, J.; Duan, J.; Duan, Y.; Tang, Q. Tailoring organic bulk-heterojunction for charge extraction and spectral absorption in CsPbBr<sub>3</sub> perovskite solar cells. *Science China Materials* **2021**, *64*, 798-807.
- (7) Duan, J.; Wang, Y.; Yang, X.; Tang, Q. Alkyl-Chain-Regulated Charge Transfer in Fluorescent Inorganic CsPbBr<sub>3</sub> Perovskite Solar Cells. *Angewandte Chemie International Edition* **2020**, *59*, 4391-4395.
- (8) Duan, J.; Zhao, Y.; Wang, Y.; Yang, X.; Tang, Q. Hole-Boosted Cu(Cr,M)O<sub>2</sub> Nanocrystals for All-Inorganic CsPbBr<sub>3</sub> Perovskite Solar Cells. *Angewandte Chemie International Edition* **2019**, *58*, 16147-16151.
- (9) Poli, I.; Baker, J.; McGettrick, J.; De Rossi, F.; Eslava, S.; Watson, T.; Cameron, P. J. Screen printed carbon CsPbBr<sub>3</sub> solar cells with high open-circuit photovoltage. *Journal of Materials Chemistry A* **2018**, *6*, 18677-18686.
- (10) Liu, X.; Tan, X.; Liu, Z.; Sun, B.; Li, J.; Xi, S.; Shi, T.; Liao, G. Sequentially vacuum evaporated high-quality CsPbBr<sub>3</sub> films for efficient carbon-based planar heterojunction perovskite solar cells. *Journal of Power Sources* **2019**, *443*, 227269.
- (1) Kulbak, M.; Cahen, D.; Hodes, G. How Important Is the Organic Part of Lead Halide Perovskite Photovoltaic Cells? Efficient CsPbBr<sub>3</sub> Cells. *The Journal of Physical Chemistry Letters* **2015**, *6*, 2452-2456.
- (2) Hoffman, J. B.; Zaiats, G.; Wappes, I.; Kamat, P. V. CsPbBr<sub>3</sub> Solar Cells: Controlled Film Growth through Layer-by-Layer Quantum Dot Deposition. *Chemistry of Materials* **2017**, *29*, 9767-9774.
- (3) Akkerman, Q. A.; Gandini, M.; Di Stasio, F.; Rastogi, P.; Palazon, F.; Bertoni, G.; Ball, J. M.; Prato, M.; Petrozza, A.; Manna, L. Strongly emissive perovskite nanocrystal inks for high-voltage solar cells. *Nature Energy* **2016**, *2*, 16194.
- (4) Lei, J.; Gao, F.; Wang, H.; Li, J.; Jiang, J.; Wu, X.; Gao, R.; Yang, Z.; Liu, S. Efficient planar CsPbBr<sub>3</sub> perovskite solar cells by dual-source vacuum evaporation. *Solar Energy Materials and Solar Cells* **2018**, *187*, 1-8.
- (5) Duan, J.; Zhao, Y.; He, B.; Tang, Q. Simplified Perovskite Solar Cell with 4.1% Efficiency Employing Inorganic CsPbBr<sub>3</sub> as Light Absorber. *Small* **2018**, *14*, 1704443.
- (6) Du, J.; Duan, J.; Duan, Y.; Tang, Q. Tailoring organic bulk-heterojunction for charge extraction and spectral absorption in CsPbBr<sub>3</sub> perovskite solar cells. *Science China Materials* **2021**, *64*, 798-807.
- (7) Duan, J.; Wang, Y.; Yang, X.; Tang, Q. Alkyl-Chain-Regulated Charge Transfer in Fluorescent Inorganic CsPbBr<sub>3</sub> Perovskite Solar Cells. *Angewandte Chemie International Edition* **2020**, *59*, 4391-4395.
- (8) Duan, J.; Zhao, Y.; Wang, Y.; Yang, X.; Tang, Q. Hole-Boosted Cu(Cr,M)O<sub>2</sub> Nanocrystals for All-Inorganic CsPbBr<sub>3</sub> Perovskite Solar Cells. *Angewandte Chemie International Edition* **2019**, *58*, 16147-16151.
- (9) Poli, I.; Baker, J.; McGettrick, J.; De Rossi, F.; Eslava, S.; Watson, T.; Cameron, P. J. Screen printed

carbon CsPbBr<sub>3</sub> solar cells with high open-circuit photovoltage. *Journal of Materials Chemistry A* **2018**, *6*, 18677-18686.

(10) Liu, X.; Tan, X.; Liu, Z.; Sun, B.; Li, J.; Xi, S.; Shi, T.; Liao, G. Sequentially vacuum evaporated high-quality CsPbBr<sub>3</sub> films for efficient carbon-based planar heterojunction perovskite solar cells. *Journal of Power Sources* **2019**, *443*, 227269.
